# Supplementary figures and images for: Liraglutide efficacy and action in non-alcoholic steatohepatitis (LEAN): study protocol for a phase II multicentre, double-blinded, randomised, controlled trial
Source: HighWire-hosted journal article supplement (doi:10.1136/bmjopen-2013-003995), 2013-11-01

Cumulative number of patients recruited to LEAN

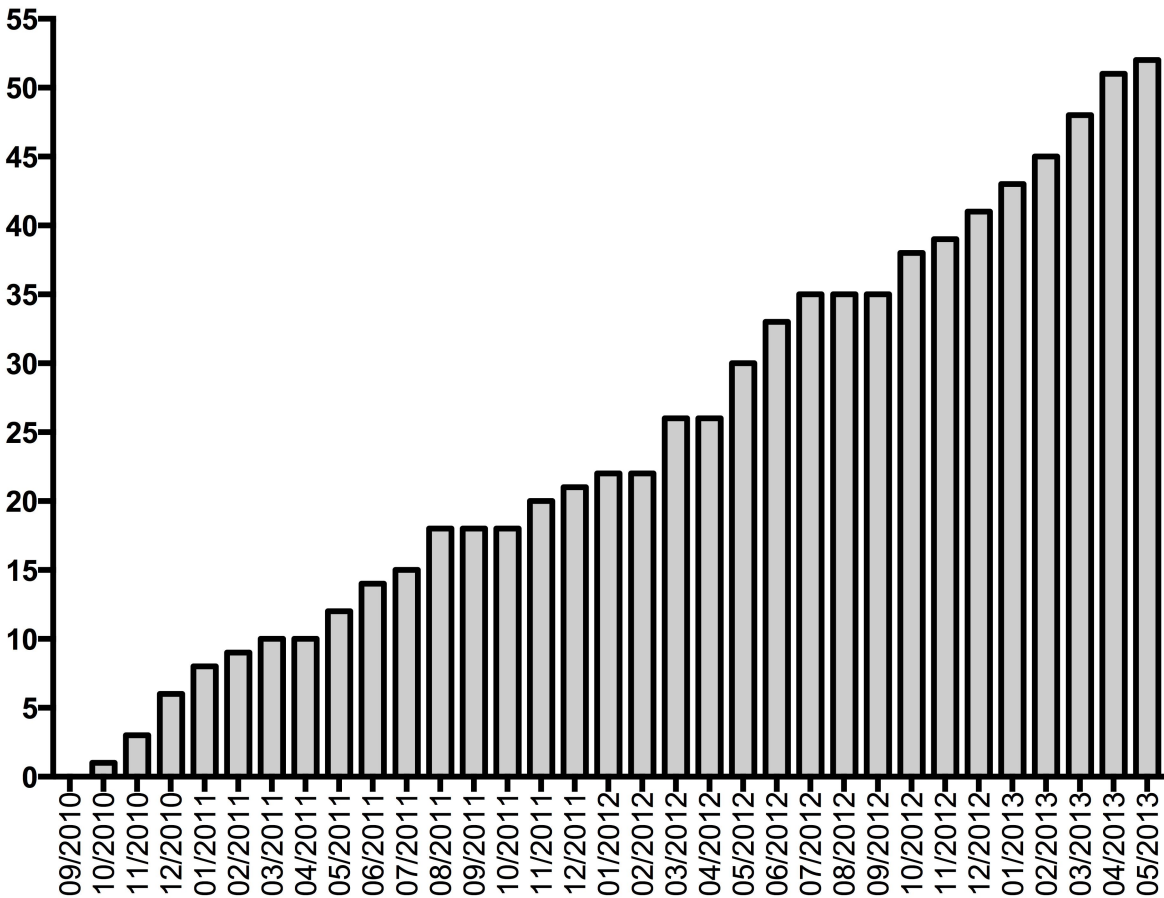

Timeline (month/year)

Supplement: bmjopen-2013-003995supp_figure.pdf [file bmjopen-2013-003995supp_figure.pdf]
